1 **Title: Early warning signs in social-ecological networks**

2 Samir Suweis<sup>1</sup> & Paolo D’Odorico<sup>2,\*</sup>

3 <sup>1</sup> *Physics Department, University of Padua, Padova, Italy*

4 <sup>2</sup> *Department of Environmental Sciences, University of Virginia, Charlottesville, VA, USA*

5

6

7

8

9 \* To whom correspondence should be addressed, Department of Environmental Sciences, 291

10 McCormick Rd., Charlottesville, VA, 22904-4123. [paolo@virginia.edu](mailto:paolo@virginia.edu), Tel. 1 (434) 806 2249

11

12

13

14 **Keywords: Leading indicators of instability, Early warning signs, Critical transitions,**

15 **Critical slowing down, Social-ecological networks, Resilience**

16

17 **Abstract**

18 A number of social-ecological systems exhibit complex behaviour associated with nonlinearities,  
19 bifurcations, and interaction with stochastic drivers. These systems are often prone to abrupt  
20 and unexpected instabilities and state shifts that emerge as a discontinuous response to gradual  
21 changes in environmental drivers. Predicting such behaviours is crucial to the prevention of or  
22 preparation for unwanted regime shifts. Recent research in ecology has investigated early  
23 warning signs that anticipate the divergence of univariate ecosystem dynamics from a stable  
24 attractor. To date, leading indicators of instability in systems with multiple interacting  
25 components have remained poorly investigated. This is a major limitation in the understanding  
26 of the dynamics of complex social-ecological networks. Here, we develop a theoretical framework  
27 to demonstrate that rising variance – measured, for example, by the maximum element of the  
28 covariance matrix of the network – is an effective leading indicator of network instability. We  
29 show that its reliability and robustness depend more on the sign of the interactions within the  
30 network than the network structure or noise intensity. Mutualistic, scale free and small world  
31 networks are less stable than their antagonistic or random counterparts but their instability is  
32 more reliably predicted by this leading indicator. These results provide new advances in  
33 multidimensional early warning analysis and offer a framework to evaluate the resilience of  
34 social-ecological networks.

35

36

37

## 38 **Introduction**

39 Social-ecological systems are often difficult to investigate and manage because of their inherent  
40 complexity (1). Small variations in external drivers can lead to abrupt changes associated with  
41 instabilities and bifurcations in the underlying dynamics (2-4). These transitions can occur in a  
42 variety of ecological and social systems, and are often unexpected and difficult to revert (4).  
43 Anticipating critical transitions and divergence from the present state of the system is  
44 particularly crucial to the prevention or mitigation of the effects of unwanted and irreversible  
45 changes (5-10). Recent research in ecology has focused on leading indicators of regime shift in  
46 ecosystems characterized by one state variable (5,7,11,12). These indicators are typically  
47 associated with the critical slowing down phenomenon: as the system approaches a critical  
48 transition, its response to small perturbations of the stable state becomes slower (11). It has  
49 been shown that in univariate systems (i.e., with only one state variable) critical slowing down  
50 entails an increase in the temporal variance and autocorrelation of the state variable (5). The  
51 case of systems with several mutually interacting components, however, has remained poorly  
52 investigated (13-15), while the connection between network stability and research on indicators  
53 for loss of resilience has been elusive (16).

54 Here we develop a theoretical framework to analyze early warning signs of instability and regime  
55 shift in complex networks. We provide analytical expressions for a set of precursors of instability  
56 in complex systems with additive noise for a variety of network structures.

57 We consider a social-ecological system with  $N$  components (nodes) coupled through a set of  
58 links. The state of the system is expressed by the vector  $\mathbf{x}$  of length  $N$ , whose terms  $x_i$  represent  
59 the state of node  $i$ . The local stability of a state  $\mathbf{x}^*$  is evaluated through a linearization,  $\frac{d\mathbf{y}}{dt} = \mathbf{A} \cdot \mathbf{y}$ ,

60 where  $\mathbf{y} = \mathbf{x} - \mathbf{x}^*$  is the displacement of  $\mathbf{x}$  from  $\mathbf{x}^*$ ;  $\mathbf{A}$  is the  $N \times N$  matrix expressing the interactions

61 among nodes in the (linearized) dynamics (see Methods). In population ecology this framework  
62 is typically used to express the dynamics of a community of  $N$  populations interacting according  
63 to the relationships determined by the matrix  $\mathbf{A}$ , often known as "*community matrix*"(2,17-19);  
64 likewise, in social systems  $\mathbf{A}$  describes the network of interactions (e.g., trade, migration, flow of  
65 information among people, groups of individuals, or countries (20-23)). The off-diagonal terms of  
66  $\mathbf{A}$  determine the pairs of interacting nodes as well as the strength of their interaction. The  
67 dynamics are stable if the maximum real part of the eigenvalues of  $\mathbf{A}$ ,  $Max[Re(\lambda)]$ , is negative.

68  
69 Classic ecological theories (2,3) have considered the case of networks with randomly connected  
70 nodes (with a certain probability,  $C$ ). The strength ( $p$ ) of the interactions between them is  
71 represented by a zero-mean random variable of variance  $\sigma^2$ . May (2,3) showed that random  
72 networks become unstable as connectivity (i.e.,  $C$ ), size (i.e.,  $N$ ) or the strength variance increase.  
73 The stability of networks with prescribed architectures (e.g., predator-prey, competitive or  
74 mutualistic interactions) also depends on connectivity, strength variance, system size, as well as  
75 on the network structure (17,19).

76 More generally, the off-diagonal terms of  $\mathbf{A}$  may result from a set of "rules" expressed as a  
77 function of a few parameters of which connectivity and strength variance are just an example.  
78 Changes in the structure and intensity of the interactions correspond to variations in these  
79 parameters, which, in turn, can lead to instability by modifying the community matrix and its  
80 eigenvalues. How can we evaluate whether ongoing changes in the interactions within a social-  
81 ecological network are reducing its resilience? Is there a way to use measurable quantities to  
82 determine whether the system is about to become unstable?

83

84 In one-dimensional systems leading indicators are typically associated with behaviors resulting  
85 from the eigenvalue tending to zero at the onset of instability. This effect entails a slower return  
86 to equilibrium after a "small" perturbation (11,24). Known as "critical slowing down", this  
87 phenomenon exists also in systems with multiple interacting components, though it is hard to  
88 recognize and therefore it does not constitute an effective leading indicator of instability. In fact,  
89 in "real world" applications the equations driving the dynamics are not known and, therefore, the  
90 network nodes in which slowing down is expected to occur are not known a priori. Critical  
91 slowing down, however, has been related to an increase in variance and autocorrelation in the  
92 state variable of one dimensional systems (5,7,25). Here we provide a theoretical framework to  
93 investigate early-warnings in the variance, autocorrelation, and power spectrum of multi-  
94 dimensional systems with interactions described by a given network structure.

95

## 96 **Methods**

97 We consider a network with  $N$  interacting nodes. The state of the system,  $\mathbf{x}=\{x_1, x_2, \dots, x_N\}$ , is  
98 governed by dynamics:  $d\mathbf{x} = \mathbf{f}(\mathbf{x}, p, C)dt + \nu \mathbf{I} dW$ , where  $\mathbf{f}=\{f_1, f_2, \dots, f_N\}$  is a  $N$ -dimensional  
99 vector function expressing the deterministic component of the dynamics of  $\mathbf{x}$ , as a function of a  
100 set of parameters,  $p$  and  $C$ ;  $\mathbf{I}$  is the identity matrix, and  $\nu dW$  is an additive stochastic driver  
101 represented by a white Gaussian noise of mean zero and intensity  $\nu dt$ . If we consider a small  
102 perturbation  $\mathbf{y}$  forcing the system away from its equilibrium point  $\mathbf{x}^*$  (i.e.,  $\mathbf{y}=\mathbf{x}-\mathbf{x}^*$ ), inserting  $\mathbf{x}=\mathbf{x}^*+\mathbf{y}$   
103 in the above equation and linearizing  $\mathbf{f}(\mathbf{x}^*+\mathbf{y}, p, C)$  around  $\mathbf{x}^*$  we obtain

$$104 \quad d\mathbf{y} = \mathbf{A}(p)\mathbf{y}dt + \mathbf{I}\nu dW, \quad (1)$$

105

106 where  $A_{ij} = [\partial f_i / \partial x_j]_{\mathbf{x}=\mathbf{x}^*}$ . Eq. (1) is a multivariate Ornstein–Uhlenbeck process (26).

107 The stable states,  $\mathbf{x}^*$ , of Eq. (1) are the same as those of their deterministic counterparts,  
108  $\frac{dx}{dt} = \mathbf{f}(\mathbf{x}, p, C)$  (27). These states are stable if the maximum real part of the eigenvalues of  $\mathbf{A}$  is  
109 negative. To identify early warning signs of network instability, we relate the steady state  
110 covariance matrix  $\mathbf{S}_y = \langle \mathbf{y}_s, \mathbf{y}_s^T \rangle$  to the eigenvalues,  $\lambda$ , of  $\mathbf{A}$ , where  $\mathbf{y}_s$  is calculated from the steady  
111 state solution of Eq. (1). We first look for leading indicators of instability in the behavior of the  
112 covariance matrix,  $\mathbf{S}_y$ , of  $\mathbf{y}$  as the system approaches instability. The  $(i,j)$  element of  $\mathbf{S}_y$  is:  
113  $S_y(i,j) = \langle y_i y_j \rangle - \langle y_i \rangle \langle y_j \rangle$ , where  $\langle \rangle$  represents the average. The covariance matrix of the  
114 stationary dynamics of the system can be obtained (26) as the solution of Eq. (2):

115

$$116 \quad \mathbf{A}(p,C)\mathbf{S}_y + \mathbf{S}_y\mathbf{A}^T(p,C) = -\nu\mathbf{I}. \quad (2)$$

117

118  $\mathbf{S}_y$  is a function of the linearization matrix,  $\mathbf{A}(p,C)$ , which, in turn, depends on the control  
119 parameters ( $p$  or  $C$ ). At the onset of instability (i.e., as  $\text{Max}[\text{Re}(\lambda)] \rightarrow 0$ ) the maximum element of  
120 the covariance matrix,  $\mathbf{S}_y$ , of  $\mathbf{y}$  increases. More details on the time-lag correlation and power  
121 spectrum can be found in the Supplementary Materials. While the linearization matrix,  $\mathbf{A}$ , here  
122 accounts the interconnections existing among nodes within the network (i.e. the pairs of nodes  
123 that are connected by a link (3, 17)), the covariance matrix,  $\mathbf{S}_y$ , expresses the variance of the  
124 fluctuations of the state variable at each node (diagonal terms) and the interrelationship  
125 (positive or negative) of the fluctuations between pairs of nodes (off-diagonal terms). To better  
126 understand the structure of  $\mathbf{S}_y$ , we look at the case of a network with only two nodes. In this case  
127 the above equation for the covariance matrix can be solved analytically, and the covariance  
128 matrix reads (26)

129 
$$S_y(p) = \frac{-v \text{Det}(\mathbf{A})\mathbf{I} + (\text{Tr}(\mathbf{A})\mathbf{I} - \mathbf{A})v\mathbf{I}(\text{Tr}(\mathbf{A})\mathbf{I} - \mathbf{A})^T}{2\text{Det}(\mathbf{A})\text{Tr}(\mathbf{A})},$$

130 where *Det* is the determinant and *Tr* the trace of the matrix, which can be expressed as a function  
131 of the eigenvalues,  $\lambda_{1,2}$ .

132 Thus, the covariance matrix diverges for  $\lambda_1, \lambda_2 \rightarrow 0$ . The time correlation matrix,  $\rho_y(\Delta)$ , can also be  
133 computed analytically and also diverges for  $\lambda_1, \lambda_2 \rightarrow 0$ , independently of  $\Delta$ . The general analytical  
134 expressions of  $\rho_y(\Delta)$  and of the power spectrum of  $\mathbf{y}$  are also reported in the Supplementary  
135 Materials.

136 We generate networks of size  $N$ , with a variety of architectures for  $\mathbf{A}$  (see Supplementary  
137 Materials), and reach instability either by keeping constant the connectivity,  $C$ , while changing  
138 the strength of the interactions,  $p$ , or by varying  $C$  for a fixed  $p$  (2,17,19). We then use the  
139 analytical relationship between the steady state covariance matrix,  $\mathbf{S}_y$ , of  $\mathbf{y}$  and the eigenvalues of  
140 the matrix  $\mathbf{A}$  (Eq. (2)). Similarly, we express the time-lag correlation,  $\rho_y$ , and the power spectrum,  
141  $\mathbf{P}_y$ , of  $\mathbf{y}$  as a function of  $\mathbf{A}$  and its eigenvalues.

142

## 143 **Results and discussion**

144 We find that the elements of both  $\mathbf{S}_y$  and  $\rho_y$  increase as the system approaches instability (i.e.,  
145  $\text{Max}[\text{Re}(\lambda)] \rightarrow 0$ ). Therefore, we investigate potential indicators for early warning in the behavior  
146 of suitable components of  $\mathbf{S}_y$ ,  $\rho_y$  and  $\mathbf{P}_y$  for  $\text{Max}[\text{Re}(\lambda)] \rightarrow 0$ . To that end we first consider the  
147 components of  $\mathbf{S}_y$  corresponding to the most connected, the most central (28) and the least  
148 connected nodes of the network. We also consider indicators based on the properties of the  
149 entire network, such as the maximum and the difference between the maximum and minimum of  
150 the matrix  $\mathbf{S}_y$ .

151 Most of the indicators based on the covariance matrix,  $\mathbf{S}_y$ , have a non-trivial dependence on  
152  $Max[Re(\lambda)]$  (see Figures 1, S1-S6). The maximum element of  $\mathbf{S}_y$  ( $Max[\mathbf{S}_y]$ ) and  $Max[\mathbf{S}_y]-Min[\mathbf{S}_y]$   
153 provide the most effective indicator of early warning in most networks (Figures 1, S7 and S8). In  
154 mutualistic (++) networks  $Max[\mathbf{S}_y]$  corresponds to the most connected node (the “hub”),  
155 regardless of their topological structure (Supplementary Materials, Figures S9-S10). All these  
156 indicators based on  $\mathbf{S}_y$  improve their performances when the size,  $N$ , of the network increases  
157 (compare main panels to insets in Figure 1; see also Supplementary Materials, Figure S11). Thus  
158 our ability to detect early warning signs and predict tipping points is enhanced in more diverse  
159 systems (16).

160 We also look at the relationship between the maximum element of the time-lag correlation  
161 matrix,  $\rho_y(\Delta)$  (where  $\Delta$  is the time lag), and  $Max[Re(\lambda)]$  for different values of  $\Delta$ ,  $p$  and  $C$  (Figures  
162 S12-S14). Although significant, these indicators are less efficient with respect to the case with  
163 zero time-lag (i.e., indicators based on  $\mathbf{S}_y$ ). Finally, the power spectrum does not appear to be an  
164 effective indicator, as we identified only weak changes in  $\mathbf{P}_y$  for increasing values of  $p$  and  
165  $Max[Re(\lambda)]$  (see Supplementary Materials, Figure S15). Therefore, here we focus on early  
166 warning signs provided by the way  $Max[\mathbf{S}_y]$  varies as a function of changes in  $Max[Re(\lambda)]$  .

167 A warning sign is effective if (a) it appears in time to prevent (or prepare for) the occurrence of  
168 instability (29-30); (b) it relies on a well-defined and easy to recognize indicator (e.g., a  
169 detectable or significant increase in variance (29-30)); and (c) it does not give false positives (or  
170 false negatives) (31). We use these criteria to evaluate the effectiveness of  $Max[\mathbf{S}_y]$  as a leading  
171 indicator of instability with different network structures and levels of noise (32).

172 To investigate the effect of noise, we first consider the “mean-field” case of networks in which the  
173 absolute value of the interaction strength between connected nodes is a constant,  $p$ ; we gradually



174 increase  $p$  or  $C$  until  $Max[Re(\lambda)]$  becomes positive (17-19). We observe (Figure 2) a consistent  
175 increase in  $Max[\mathbf{S}_y]$  for all network structures, regardless of whether instability is attained by  
176 increasing interaction strength or connectivity (Figures S1-S6). The network structure, however,  
177 affects the timeliness of  $Max[\mathbf{S}_y]$  as a leading indicator. In fact,  $Max[\mathbf{S}_y]$  exhibits a more defined  
178 increase and a better anticipation of the onset of instability in the case of random networks than  
179 with all the other structures. In the case of these “mean field” networks we did not consider the  
180 antagonistic structure because antagonistic networks with constant interaction strength (in  
181 absolute value) are always stable regardless of the parameters  $p$  and  $C$  (see Supplementary  
182 Materials, Figs. S1, S2).

183 Likewise, in the case of random interaction strengths  $Max[\mathbf{S}_y]$  exhibits a well-defined increase  
184 and a better anticipation of the instability in random networks than with the more organized  
185 structures typical of ecological or social systems (Figures 3, S3-S6). The seemingly weaker  
186 increase in  $Max[\mathbf{S}_y]$  observed in the social-ecological networks is only an apparent effect of the  
187 scale. Indeed, as it will be shown later, suitable detection criteria of early warnings are more  
188 successful in mutualistic networks than in their random counterparts. Noise has the effect of  
189 amplifying the intensity of the warning sign (compare the scales in Figs. 2 and 3), while inducing  
190 weak random fluctuations with no substantial impact on the overall behavior of  $Max[\mathbf{S}_y]$  at the  
191 onset of instability (see Supplementary Materials). In scale free networks the increase in  $Max[\mathbf{S}_y]$   
192 (Figure 3) is again only apparently muted. In fact, in these networks detection criteria are quite  
193 successful in recognizing early warning signs (Figure 4); moreover, local indicators (e.g., the  
194 variance of the most central node) can exhibit a more pronounced increase that can be used as  
195 an early warning sign of instability (Figure 1 and Supplementary Materials).

196

## 197 **Conclusions**

198 We have identified some suitable early warning signs in social-ecological networks in agreement  
199 with those identified by Ref. (33), and provided a theoretical framework for their interpretation.  
200 Overall, the performances of  $Max[\mathbf{S}_y]$  as a leading indicator of instability change between random,  
201 antagonistic, mutualistic/social networks. This indicator gives an earlier and “sharper” warning  
202 sign in random than mutualistic and social networks. The warning sign, however, is harder to  
203 detect and is more likely to be missed in random and antagonistic networks than in their  
204 mutualistic or social counterparts (Figures 4, S16). Thus, by affecting the probability that early  
205 warnings are missed, the sign of the interactions within the network determines the consistency  
206 and reliability of this leading indicator. In fact, different realizations of the same network  
207 dynamics can yield different results in the behavior of  $Max[\mathbf{S}_y]$  and thus this indicator might not  
208 detect in useful advance the emergence of instability (Figures S17-S18). The probability of true  
209 positives is close to 100% (i.e., negligible probability of false negatives) in mutualistic networks,  
210 and much smaller in random and antagonistic (predator-prey, cascade or compartment)  
211 networks (Figures 4, S16). Thus, while mutualistic networks are less stable than their  
212 antagonistic counterparts (17), their instability can be predicted with less uncertainty. An  
213 increase in  $Max[\mathbf{S}_y]$ , however, would not provide information on how close the system is to the  
214 onset of instability. Rather, it would just indicate that the system is losing resilience and  
215 approaching unstable conditions (29). Therefore, in contrast to previous expectations (16), it is  
216 not the heterogeneity in the topology of the network that plays a key role in the abruptness of  
217 critical transitions and our ability to predict them. Rather, it is the type of interactions between  
218 the nodes that determines how networks respond to external perturbations. In fact, there is a  
219 trade-off between local and systemic resilience: mutualism (++) is associated with a reduced

220 local stability and resilience of the system (17,19), but does not induce abrupt critical transitions.  
221 In contrast, networks with mixtures of interaction types (+-, ++, --) exhibit shorter recovery times  
222 after displacement from equilibrium (i.e., a stronger local resilience) (17-18), but in these  
223 systems the emergence of systemic instability and critical transitions is more difficult to predict  
224 in useful advance.  
225 This study combines stability theories from community ecology (2,17) to recent research on  
226 indicators of critical transition (7,9,16), and develops a unified framework that offers a new  
227 perspective for the evaluation of the resilience and anticipation of instability in social-ecological  
228 networks.  
229

230 **References**

- 231 1. Berkes F., Folke, C. and Colding, J. 2000. *Linking Social and Ecological Systems: Management*  
232 *Practices and Social Mechanisms for Building Resilience*, Cambridge University Press.
- 233 2. May, R. M., 1972. Will a large complex system be stable? *Nature*, **238**:413-414.
- 234 3. May, R. M. 1973. *Stability and Complexity in Model Ecosystems*. Princeton University Press,  
235 Princeton.
- 236 4. Walker, B. H. and Salt, D. 2006. *Resilience Thinking: Sustaining Ecosystems and People in a*  
237 *Changing World*, Island Press, Washington, D.C.
- 238 5. Carpenter S.R. and Brock W.A. 2006. Rising variance: a leading indicator of ecological  
239 transition. *Ecol Lett* **9**:311–318.
- 240 6. Scheffer M. 2009. *Critical transitions in nature and society*. Princeton University Press,  
241 Princeton.
- 242 7. Scheffer, M., et al. 2009. Early-warning signals for critical transitions. *Nature* **461**:53–59.
- 243 8. Dakos, V., Scheffer, M., van Nes, E.H., Brovkin, V., Petoukhov, V. & Held, H.H. 2008. Slowing  
244 down as an early warning signal for abrupt climate change. *Proc. Natl. Acad. Sci. USA*  
245 **105**:14308–14312.
- 246 9. Lade, S.J., Tavoni, A., Levin, S.A. and Schluter, M. 2013. Regime shifts in a social-ecological  
247 system, *Theor. Ecol.* **6**(3): 359-372.
- 248 10. Carpenter S.R., et al. 2011. Early warnings of regime shifts: a whole-ecosystem experiment.  
249 *Science* **332**:1079–1082.
- 250 11. van Nes, E. H. and Scheffer M. 2007. Slow recovery from perturbations as a generic indicator  
251 of a nearby catastrophic shift. *Am. Nat.* **169**:738–747.

- 252 12. Dakos, V., van Nes, E.H., D'Odorico, P., Scheffer, M. 2012. How robust are variance and  
253 autocorrelation as early-warning signals for critical transitions? *Ecology* **93**(2):264–271.
- 254 13. Colbaugh, R., and Glass, K. 2012. Early warning analysis for social diffusion events, *Security*  
255 *Informatics* **1**:18.
- 256 14. Kuehn, Christian, Gerd Zschaler, and Thilo Gross, 2014. "Early warning signs for saddle-  
257 escape transitions in complex networks." arXiv preprint arXiv:1401.7125.
- 258 15. Lever, J. Jelle, et al. "The sudden collapse of pollinator communities", 2014. *Ecology letters*  
259 **17**.3: 350-359.
- 260 16. Scheffer, M., et al., 2012. Anticipating Critical Transitions, *Science* **338**:344.
- 261 17. Allesina S. and Tang S., 2012. Stability criteria for complex ecosystems *Nature* **483**: 205–  
262 208.
- 263 18. Suweis, S., Grilli, J. and Maritan, A. 2014, Disentangling the effect of hybrid interactions and  
264 of the constant effort hypothesis on ecological community stability. *Oikos*, **123**: 525–532.  
265 doi: 10.1111/j.1600-0706.2013.00822.x
- 266 19. Suweis, S., Simini, F., Banavar, J. and Maritan, A. 2013. Emergent structural and dynamical  
267 properties of ecological mutualistic networks. *Nature*. **500**:449.
- 268 20. Kaluza, P., Kölzsch, A., Gastner, M.T. and Blasius B., 2010. The complex network of global  
269 cargo ship movements *J. R. Soc. Interface*, **7**: 1093–1103.
- 270 21. Suweis, S., et al. 2011. "Structure and controls of the global virtual water trade network."  
271 *Geophysical Research Letters* **38**.10.
- 272 22. Suweis, S., Rinaldo, A., Maritan, A. and D'Odorico P., 2013. Water-controlled wealth of  
273 nations, *Proc. Natnl Acad. Sci, USA*, **110**(11), 4230-4233.

- 274 23. Davis, K., D'Odorico, P., Laio, F. and Ridolfi, L., 2013. Human migration in a globalizing world  
275 *PLoS ONE* **8**(1): e53723.
- 276 24. Strogatz, S. H. 1994. *Nonlinear dynamics and chaos with applications to physics, biology,*  
277 *chemistry and engineering*. Perseus Books.
- 278 25. Brock, W. A., and Carpenter S.R. 2006. Variance as a leading indicator of regime shift in  
279 ecosystem services. *Ecology and Society* **11**(2):9.
- 280 26. Gardiner C.W. 1986. *Handbook of stochastic methods*. Springer, Berlin.
- 281 27. Horsthemke, W. and Lefever, R. 1984. *Noise-Induced Transitions: Theory and Applications in*  
282 *Physics, Chemistry and Biology*. Springer, Berlin.
- 283 28. Newman M.E.J. 2010. *Networks: An Introduction*, Oxford University Press, Oxford.
- 284 29. Biggs, R., Carpenter, S. R. and Brock, W. A. 2008. Turning back from the brink: Detecting an  
285 impending regime shift in time to avert it. *Proc. Natnl Acad. Sci, USA*, **106**:826–831.
- 286 30. Contamin R. and Ellison A.M. 2009. Indicators of regime shifts in ecological systems: what  
287 do we need to know and when do we need to know it? *Ecol. App.* **19**:799–816.
- 288 31. Dakos V., et al. 2012. Methods for detecting early warnings of critical transitions in time  
289 series illustrated using simulated ecological data. *PLoS ONE* **7**(7):e41010.
- 290 32. Boettiger C. and Hastings A. 2012. Quantifying limits to detection of early warning for  
291 critical transitions. *J R Soc Interface* **9**(75): 2527–2539.
- 292 33. Kuehn, C., E.A. Martens, D.M. Romero, 2014. Critical transitions in social network activity,  
293 *Journal of Complex Networks* doi:10.1093/comnet/cnt022.
- 294 **34.** Albert R. and Barabasi A-L. 2002. Statistical mechanics of complex network. *Rev Mod Phys*  
295 **74**(1):47.

296

297

298

299

300

301

302

303

304

305

306 **Figures**

307

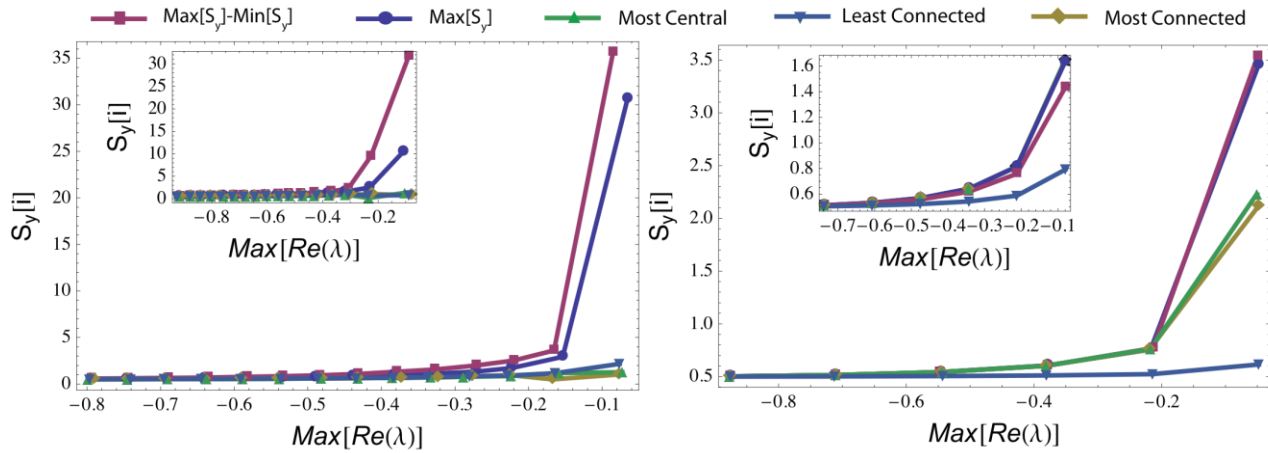

308

309

310 **Figure 1.** Leading indicators of instability based on different elements of the covariance matrix  
 311 ( $S_y$ ), including the maximum (in absolute value) element,  $Max[S_y]$ , the difference between  
 312  $Max[S_y]$  and  $Min[S_y]$ , the element of  $S_y$  corresponding to the most connected, least connected, or  
 313 highest eigenvector centrality (24) network node. Random (left) and scale free (right) (30)  
 314 network generated with  $N=50$  and  $C=0.1$  (main panels) and  $N=0.1$  and  $C=0.5$  (insets). Instability  
 315 (i.e., decrease in  $Max[Re(\lambda)]$ ) is attained by increasing the interaction strength  $p$  (mean field  
 316 case). The figures represent average behavior over 100 realizations.

317



318

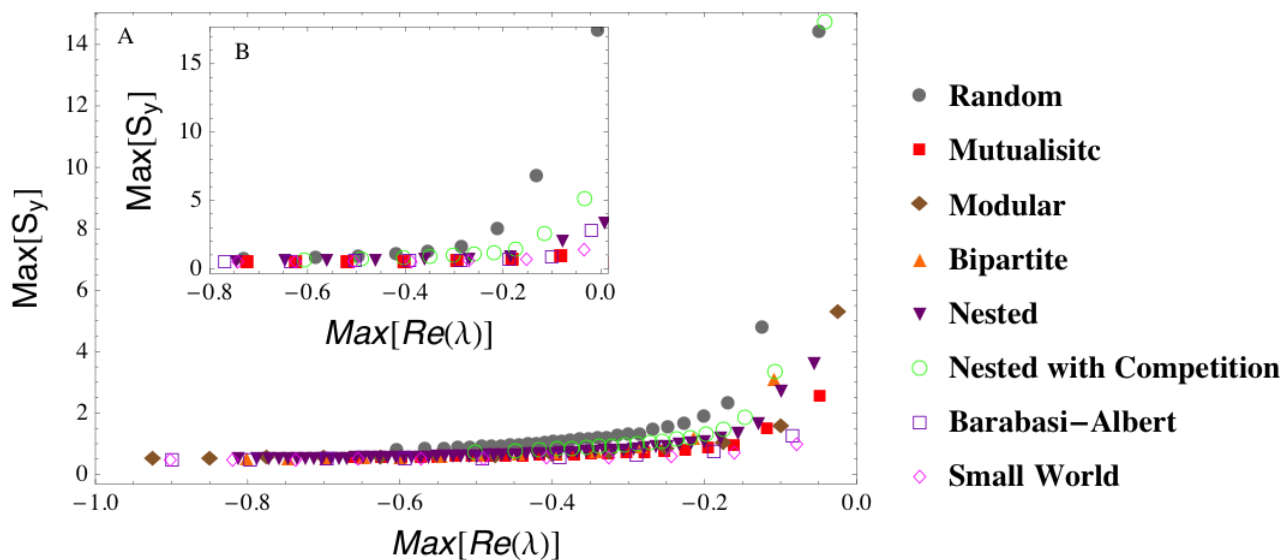

319

320

321 **Figure 2.**  $Max[S_y]$  as a leading indicator of instability in a “mean field” network with constant  
322 interaction intensity (in absolute value),  $p$ . Instability is attained by increasing  $p$  (main panel A,  
323 with  $N=20$ ,  $C=0.2$ ) or  $C$  (inset B, with  $N=20$ , and  $C$  increasing from 0.1 to 1) with different network  
324 structures. The figures represent average behavior over 1000 realizations.

325

326

327

328

329

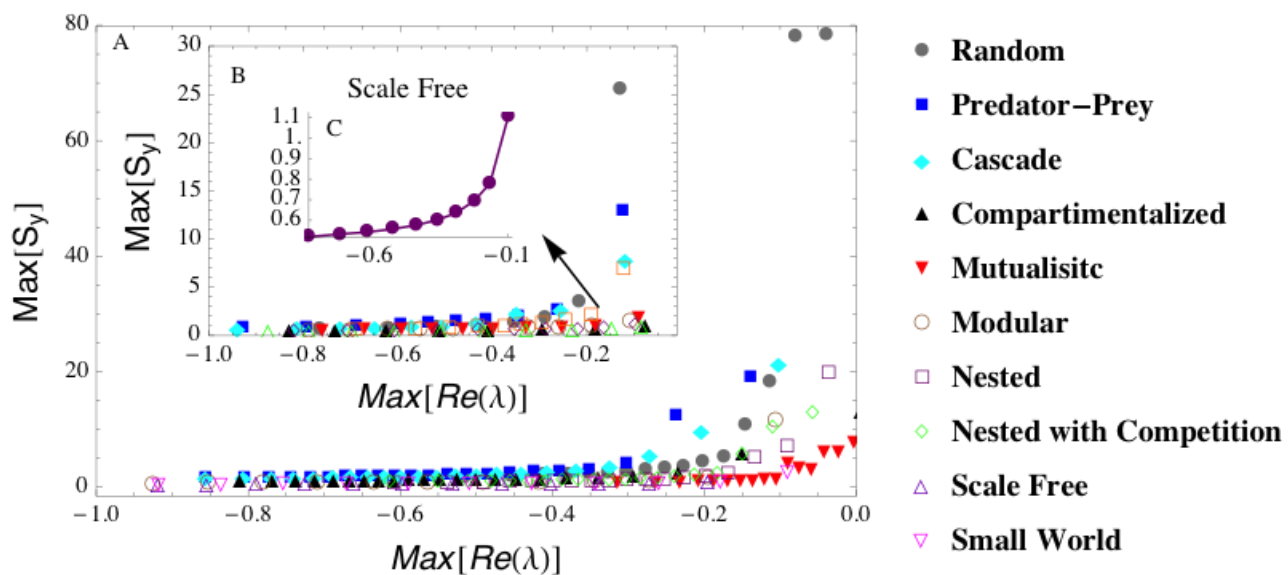

330

331

332 **Figure 3.** A) Case with random interaction strength (see methods). Main panel: instability is  
333 reached by increasing  $p$  (with  $N=20$ ;  $C=0.2$ ). First inset (B):  $p$  is constant while  $C$  increases  
334 between 0.1 and 1. C) Same as the first inset (B) but only for the scale-free network (notice the  
335 different scale on the vertical axis). The figures represent average behavior over 1000  
336 realizations.

337

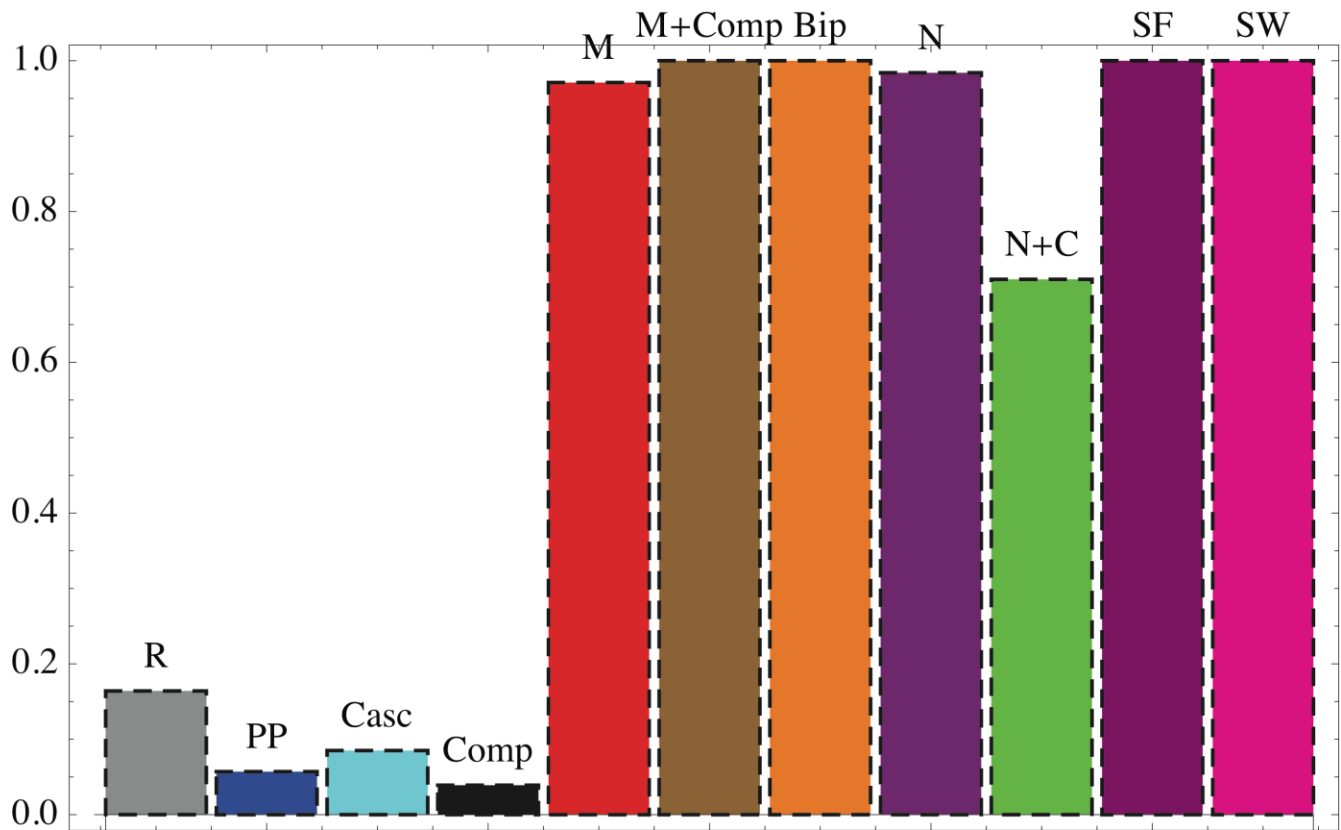

338

339 **Figure 4.** Distribution of the correlation,  $\rho_K$ , between  $Max[S_y]$  and the parameter  $p$ , after 1000  
340 realizations for the full disordered (not mean-field) case. If  $\rho_K$  is significant ( $p$ -value $<0.05$ ) and  $\rho_K$   
341  $> 0.5$  the increase in  $Max[S_y]$  is interpreted as an early warning sign. We calculate these detection  
342 statistics for several realizations of each network structure and determine the probability of  
343 detecting the early warning sign of instability. We consider eleven different network  
344 architectures typical of ecological or social networks, including random (R), predator-prey (PP),  
345 cascade (Casc), compartmentalized (Comp), mutualistic (M), bipartite (Bip), nested (N), nested  
346 with competition (N+C), scale free (SF), and small world (SW). These networks have different  
347 structures for the adjacency matrix and different combination of interaction types, i.e (++)  
348 mutualistic, (+-) antagonistic, (--) competitive or a combination of them (See Supplementary  
349 Materials for more details).

## 1 **Supplementary online materials**

### 2 **S1. Structures of Socio-Ecological Interacting systems.**

3 a) *Random matrix* (1) with connectivity  $C$ . We pick an element  $A_{i,j}$  at random, and with  
4 probability  $C$  we assign a link between nodes  $i$ - $j$  and  $j$ - $i$  ( $A_{j,i}$ ). Each of these two links has a  
5 weight (or strength),  $p$ , that is positive (or negative) with probability 0.5; b) *Antagonistic*  
6 *matrix* (2), where connections are again random (with probability  $C$ ), but if  $A_{i,j}$  has sign  $+(-)$ ,  
7 then  $A_{j,i}$  has sign  $- (+)$ ; c) *Cascade network* (3): links occur with a given probability, but form a  
8 hierarchical structure, whereby there is a top “predator” (with sign  $+$ ) that feeds on all the  
9 other species (with sign  $-$ ); then there is the second top predator, and so on; species left with  
10 the lowest ranking function as producers; d) *Compartmentalized* structure (5), formed by  
11 groups of antagonistic species that interact only with species within their own group; e)  
12 *Mutualistic network* (6), with a random matrix, but where both  $A_{i,j}$  and  $A_{j,i}$  have positive signs  
13  $(++)$ ; f) *Modular mutualistic* matrix (5): nodes are divided into communities that positively  
14 interact within their groups  $(++)$ . g) *Bipartite Mutualistic* matrix (6): nodes are divided into  
15 two groups, and each node positively interacts only with nodes of the other group  $(++)$ ; h)  
16 *Bipartite Nested Mutualistic* (7): a bipartite graph is generated with hierarchical structure  
17 where specialist nodes (i.e., with only few mutualistic links) tend to interact with a suitable  
18 subset of the mutualistic partners of the generalist nodes  $(++)$ ; i) *Nested Mutualistic with*  
19 *Competition* (8): nodes are divided into two groups; each node positively interact with nodes  
20 of the opposite group  $(++)$ , while compete with nodes of the same group  $(--)$ ; j) *Barabasi-*  
21 *Albert (BA) networks* (9): binary one-zero networks are generated with power-law degree  
22 distribution. This algorithm simulates a preferential attachment process, in which a new  
23 vertex with  $d$  edges is added at each step. The BA graph displays a scale-free behavior that  
24 strongly correlates with the network's robustness to failure. We then assign to each link a

25 positive weight  $p$ ; The connectivity of the BA networks is controlled indirectly by the  
26 parameter  $d$ . In our simulation we set  $d=1$  to generate low connectivity networks,  $d=2$  for  
27 average connectivity and  $d=4$  for high connectivity. k) *Watts-Strogatz (WS) network* (10): this  
28 is a one-parameter (degree of disorder  $r$ ) model that interpolates between an ordered finite  
29 dimensional lattice and a random graph. Its main property is to display both high clustering  
30 coefficient and small world property. The WS model displays this duality for a wide range of  
31 the rewiring probabilities  $r$ . In our simulation we used  $r=0.3$ . The connectivity of the WS  
32 model depends on the starting  $2k$ -regular graph (10). For low connectivity we set  $k=2$ ; for  
33 average connectivity  $k=4$ ; for high connectivity  $k>5$ .

34 The linkage density in each network is described by the parameter  $C$  (the connectivity ).

35 We generate each of the structures  $(a)$ - $(k)$  keeping constant the connectivity  $C$  and changing  
36 the strength of the interactions (alternatively, we fix  $p$  and vary  $C$ ), until the dynamics become  
37 unstable (1,6). Thus, we use the parameter,  $p$ , as an indicator of the weights of the interactions  
38 between connected nodes (connectivity). We consider three different levels of disorder in the  
39 control parameter  $p$ : 1) *Mean Field*: where we assign a constant value,  $p$ . We do not consider  
40 antagonistic mean field networks (i.e., with constant  $|p|$  but  $(+)$ - interactions) because they  
41 are always stable (see below); 2) *Weak disorder*: the interaction strength is drawn from a  
42 normal distribution with mean  $p$  and standard deviation  $0.1 p$  (i.e.,  $\mathcal{N}(p, 0.1 p)$ ); 3) *Strong*  
43 *disorder*: interaction strengths are drawn at random from  $\pm|\mathcal{N}(0, p)|$  (6). Therefore, in all  
44 these cases, by increasing the value of  $p$  ( $C$ ) the resilience decreases until the system become  
45 unstable for  $p=p_c$ , or  $C=C_c$  (6).

46

47

## 48 **S2.1 Early Warnings in Multidimensional Mean Field Networks**

49

50 In the mean field case with (++) interactions, the matrix is symmetric ( $\mathbf{A}=\mathbf{A}^T$ ) and therefore all  
51 eigenvalues are real numbers. In this case we note that, if  $\mathbf{U}$  is the matrix of the eigenvectors  
52 of  $\mathbf{A}$  (i.e.  $\mathbf{A} \mathbf{u}_i = \lambda_i \mathbf{u}_i$ ), then  $\mathbf{U} \mathbf{A} \mathbf{U}^T = \mathbf{diag}(\lambda)$ , where  $\mathbf{diag}(\lambda)$  is a diagonal matrix with all the  
53 eigenvalues of  $\mathbf{A}$ . Therefore in this case we can write Eq. (2) in the main text as:

$$54 \quad \mathbf{U} \mathbf{A} \mathbf{U}^T \mathbf{U} \mathbf{S}_y \mathbf{U}^T + \mathbf{U} \mathbf{S}_y \mathbf{U}^T \mathbf{U} \mathbf{A} \mathbf{U}^T = -\nu \mathbf{I} = \mathbf{diag}(\lambda) \mathbf{\Sigma} + \mathbf{\Sigma} \mathbf{diag}(\lambda),$$

55 where  $\mathbf{U} \mathbf{U}^T = \mathbf{I}$  and  $\mathbf{\Sigma} = \mathbf{U} \mathbf{S}_y \mathbf{U}^T$  is a diagonal matrix whose  $i$ -th eigenvalue is  $\zeta_i = -\frac{\nu}{2 \lambda_i}$ .

56 Therefore if the socio-ecological system reaches an instability (i.e.  $\lambda_i=0$ ) for a given  $i$ , then  
57 there is at least one element of the matrix  $\mathbf{\Sigma}$  and thus of  $\mathbf{S}_y$  that diverges.

58 We also notice that in the mean field case we omit the analysis of early-warning performed on  
59 antagonistic (+-) matrices,  $\mathbf{A}'$ . In fact, if  $\mathbf{A}'$  is anti-symmetric (i.e.,  $\mathbf{A}' = -\mathbf{A}'^T$ , and thus with  
60 predator prey, cascade or compartmentalized interactions), then the early warning analysis  
61 on those matrices is trivial as their stability does not depend on  $p$  or  $C$ . In fact, if we multiply  
62 the off-diagonal terms of those matrices by the imaginary unit  $i$ , i.e.  $\mathbf{B} = i (\mathbf{A}' - \mathbf{I} \mathbf{A}')$ , then  $\mathbf{B}$  is  
63 Hermitian and has all real eigenvalues. Therefore  $\mathbf{A}' - \mathbf{I} \mathbf{A}'$  has all pure complex eigenvalues  
64 independently of  $p$  and  $C$ , which means that  $\mathbf{A}'$  is always stable – given that the self interaction  
65 terms are negative constant, i.e.  $A'_{i,i} = -d < 0$ .

66 Figures S1 and S2 show a rise in  $Max[\mathbf{S}_y]$  as the system approaches instability in mean field  
67 networks.

68

69

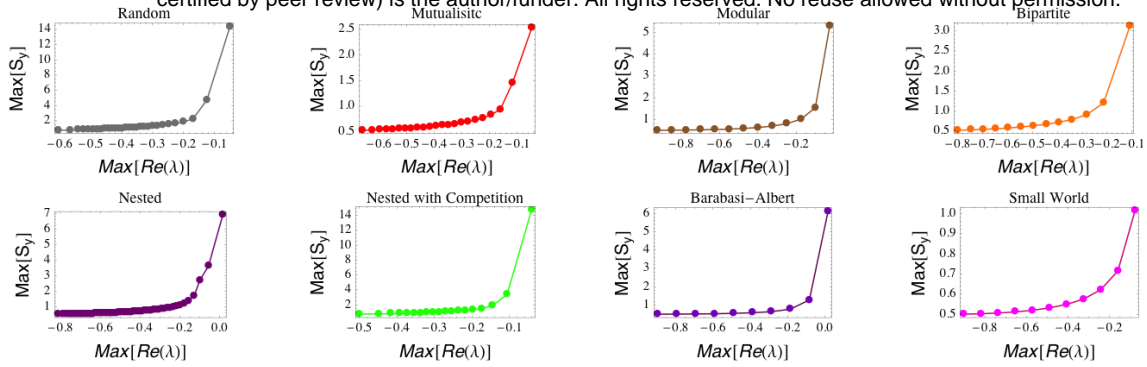

70

71

72 **Figure S1.** Increase in  $\text{Max}[S_y]$  as  $\text{Max}[Re(\lambda)]$  tends to zero for mean field networks of size,  
 73  $N=20$ ,  $C=0.2$ . Increasing values of  $\text{Max}[Re(\lambda)]$  are obtained by increasing the interaction  
 74 strength,  $p$ . The plotted values are the ensemble averages of 1000 realizations.

75

76

77

78

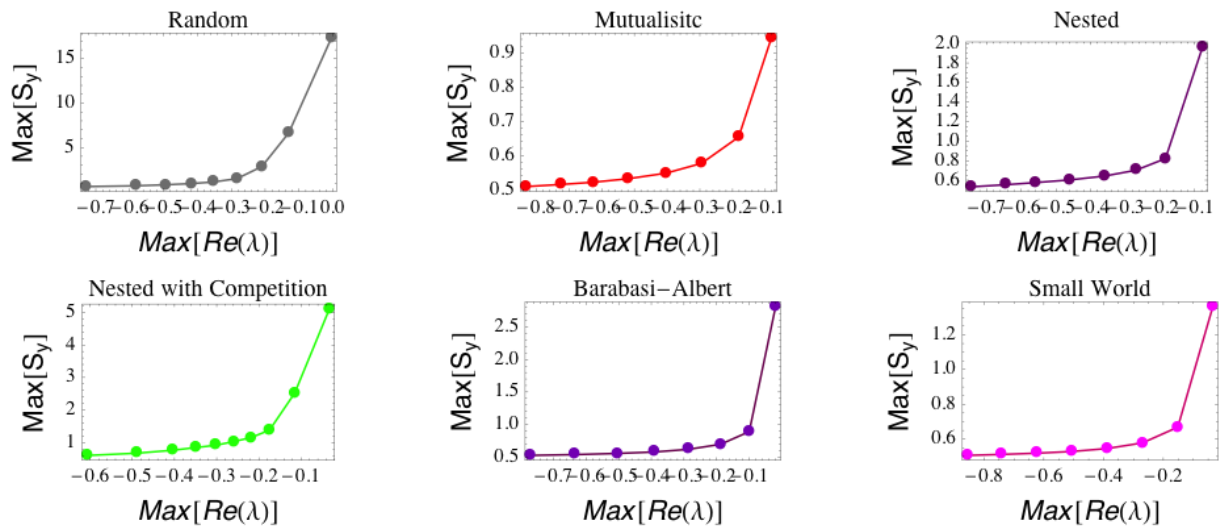

79

80

81 **Figure S2.** Increase in  $\text{Max}[S_y]$  as  $\text{Max}[Re(\lambda)] \rightarrow 0$  for mean field networks of size,  $N=20$ ,  $p \ll p_c$ .  
 82 Increasing values of  $\text{Max}[Re(\lambda)]$  are obtained by increasing the connectivity,  $C$ . The plotted  
 83 values are the ensemble averages of 1000 realizations.

84

85 **S2.2 Early Warnings in Complex Networks with Weak Disorder**

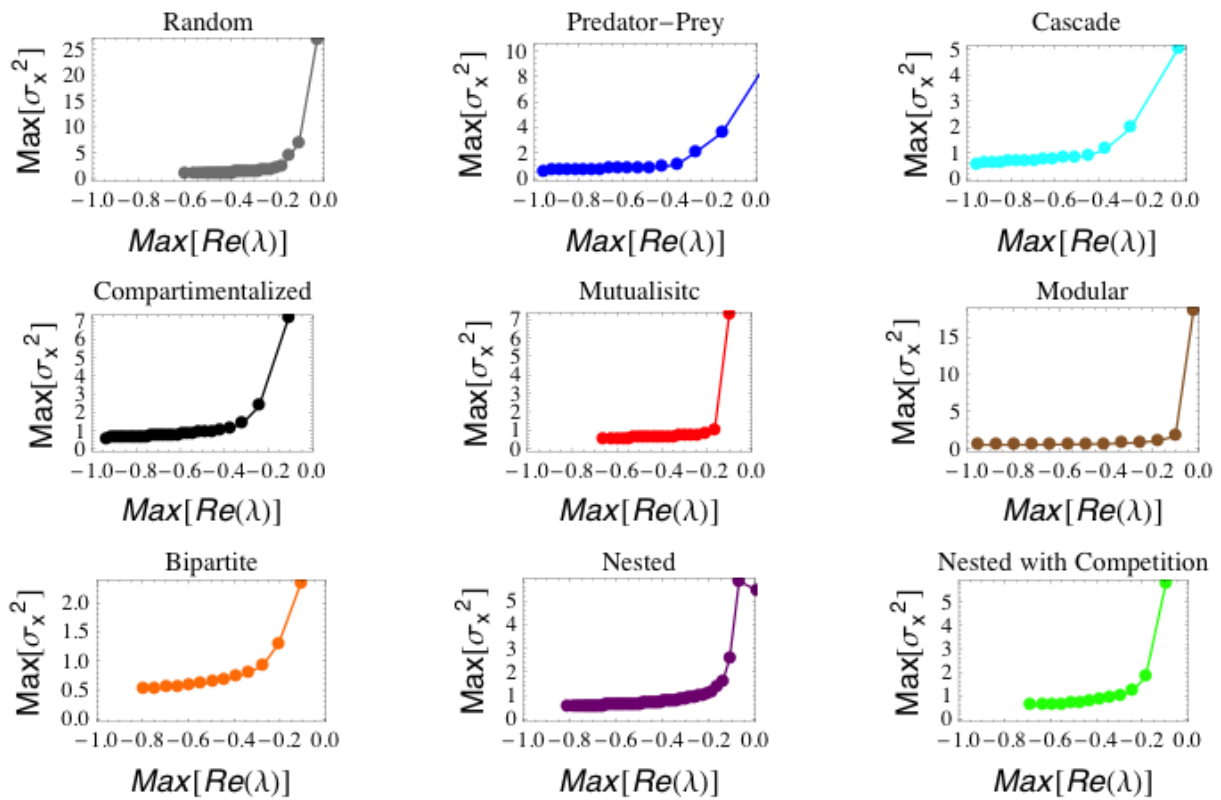

86

87

88 **Figure S3.** Increase in  $\text{Max}[\sigma_y]$  as  $\text{Max}[Re(\lambda)]$  tends to zero for complex networks with “weak”  
89 disorder (see Section 1) of size,  $N=20$  and  $C=0.2$ . Increasing values of  $\text{Max}[Re(\lambda)]$  are obtained  
90 by increasing the interaction strength,  $p$ . The plotted values are the ensemble averages of  
91 1000 realizations.

92

93

94



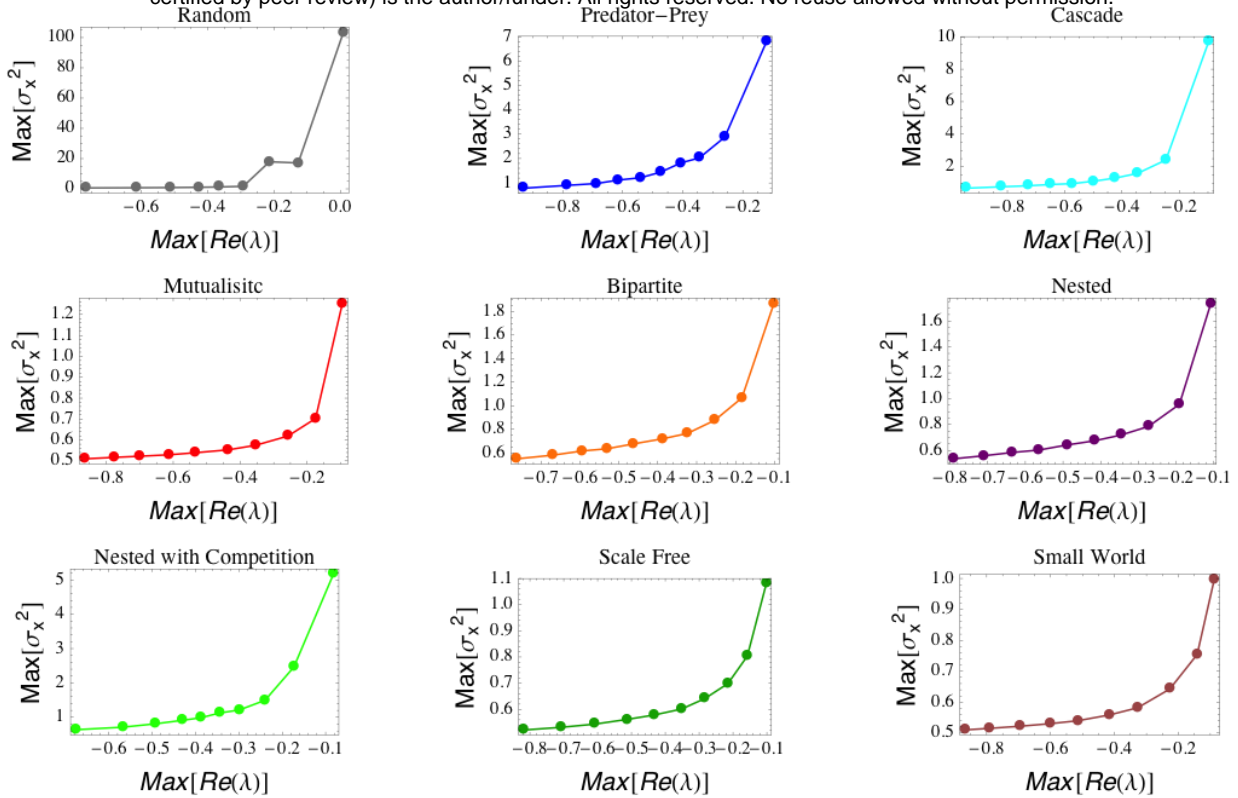

95

96

97 **Figure S4.** Increase in  $\text{Max}[\mathbf{S}_y]$  as  $\text{Max}[\text{Re}(\lambda)] \rightarrow 0$  for complex networks with “weak” disorder

98 (see Section 1) of size,  $N=20$  and  $p << p_c$ . Increasing values of  $\text{Max}[\text{Re}(\lambda)]$  are obtained by

99 increasing the connectivity,  $C$ . The plotted values are the ensemble averages of 1000

100 realizations.

101

102

103 **S2.3 Early Warnings in Complex Networks with Strong Disorder**

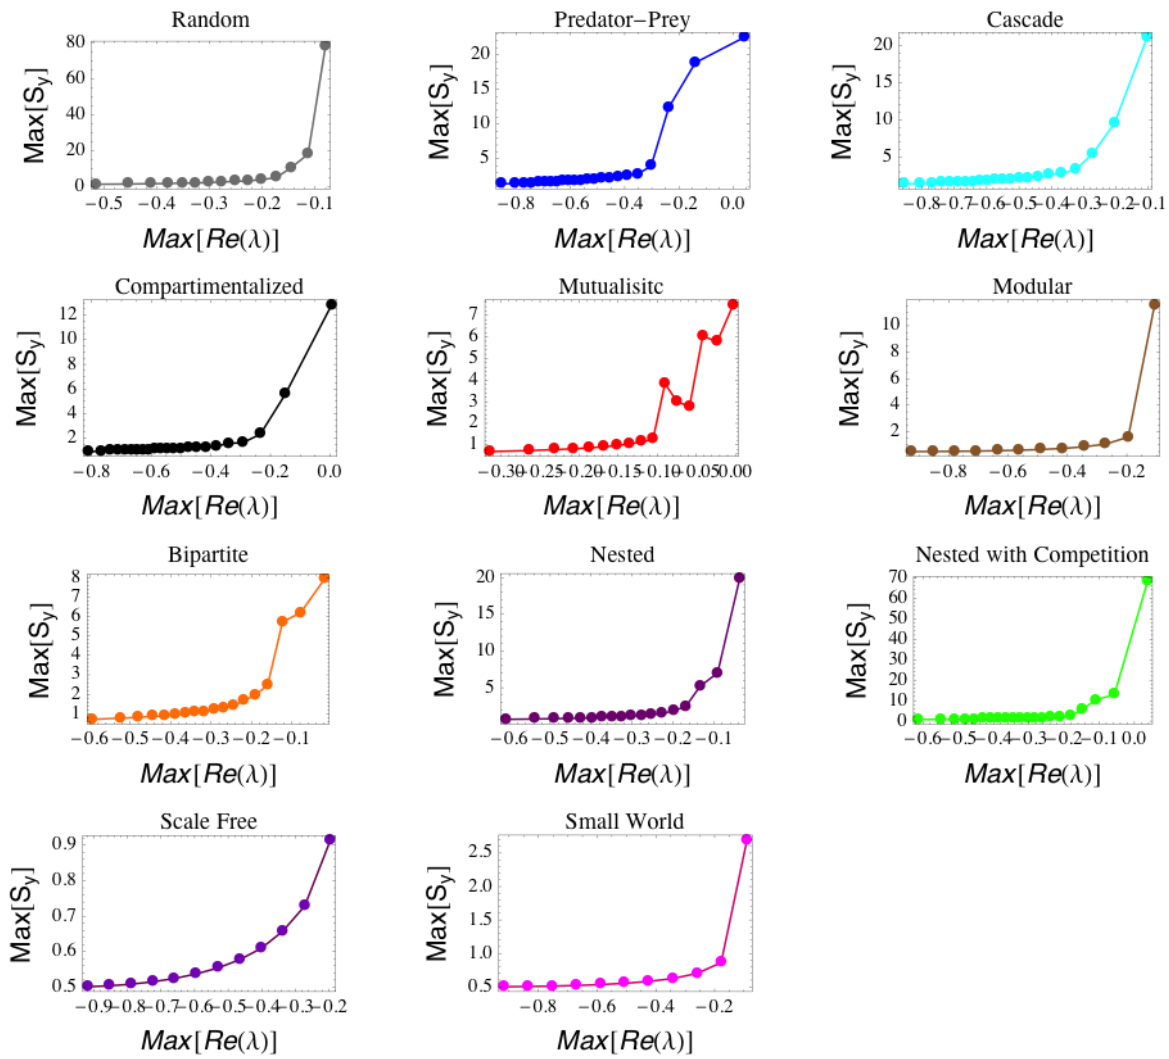

104

105

106 **Figure S5.** Increase in  $\text{Max}[S_y]$  as  $\text{Max}[Re(\lambda)]$  tends to zero for complex networks with  
 107 “strong” disorder (see Section 1) of size,  $N=20$  and  $C=0.2$ . Increasing values of  $\text{Max}[Re(\lambda)]$  are  
 108 obtained by increasing the interaction strength,  $p$ . The plotted values are the ensemble  
 109 averages of 1000 realizations.

110

111

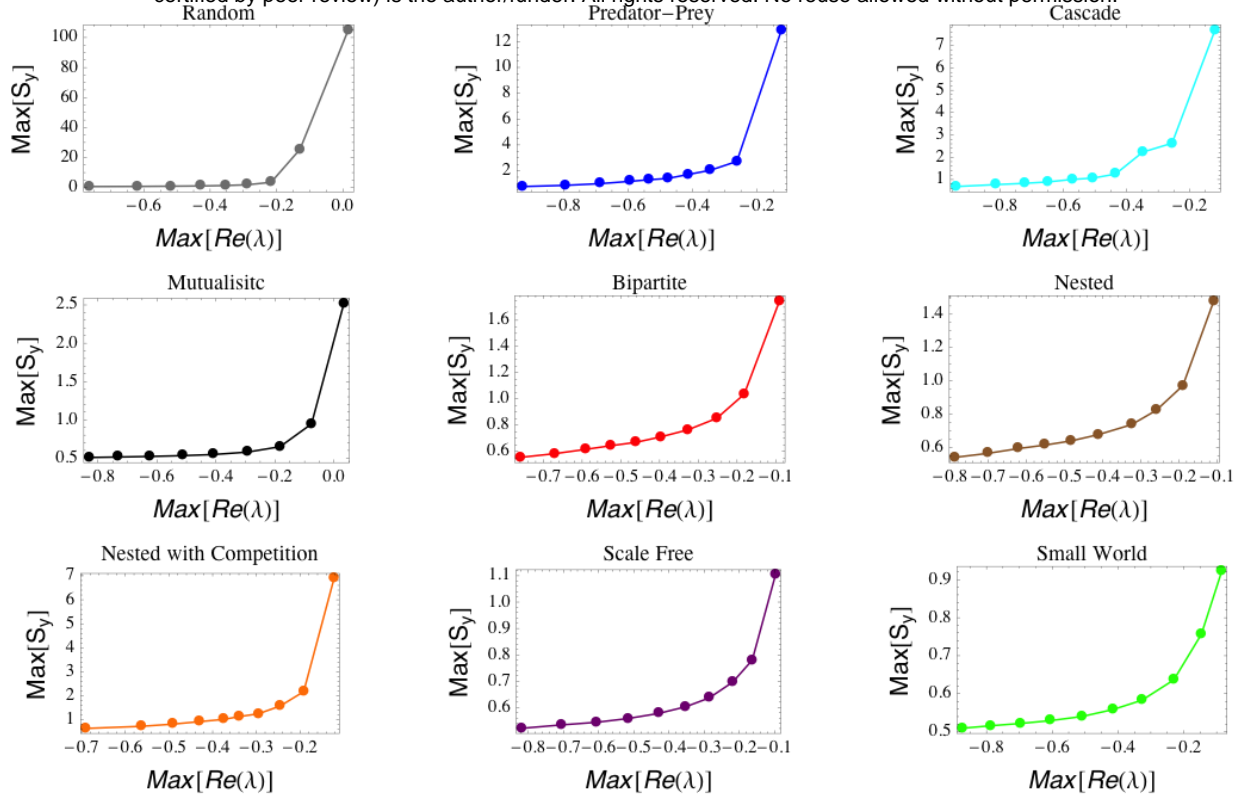

112

113

114 **Figure S6.** Increase in  $\text{Max}[S_y]$  as  $\text{Max}[\text{Re}(\lambda)]$  tends to zero for complex networks with  
 115 “strong” disorder (see Section 1) of size,  $N=20$ . Increasing values of  $\text{Max}[\text{Re}(\lambda)]$  are obtained  
 116 by increasing the connectivity,  $C$ . The plotted values are the ensemble averages of 1000  
 117 realizations.

118

### 119 S3. Indicators and Node Properties

120 In this section we show more analysis on the effectiveness of different node variances as

121 precursors of instability.

122

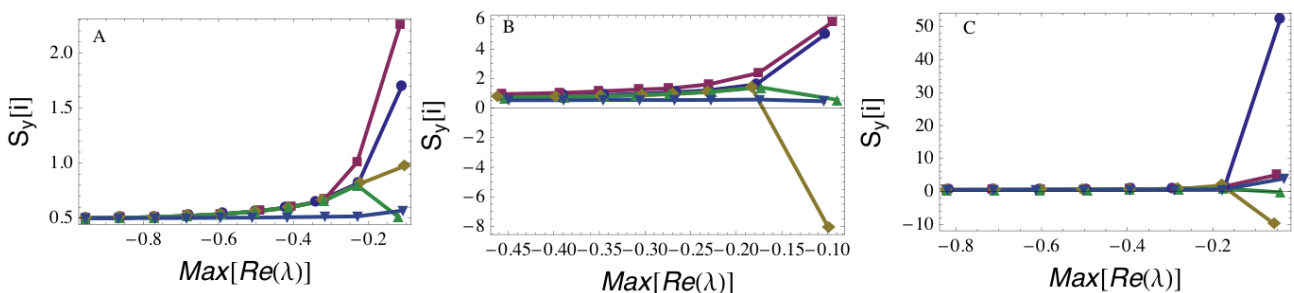

123

124

125 **Figure S7.** Elements of the covariance matrix  $S_y$  corresponding to nodes with the highest  
 126 number of connections (green), lowest number of connections (light blue), highest  
 127 eigenvector centrality (gold),  $\max[S_y]$  (violet) and  $\max[S_y]-\min[S_y]$  (purple), in the case of:  
 128 (A) mutualistic, (B) mutualistic nested with competition, (C) small world interactions, for  
 129 mean field networks (of size  $N=20$  and connectivity  $C=0.3$ ). The plotted values are the  
 130 ensemble averages of 1000 realizations.

131

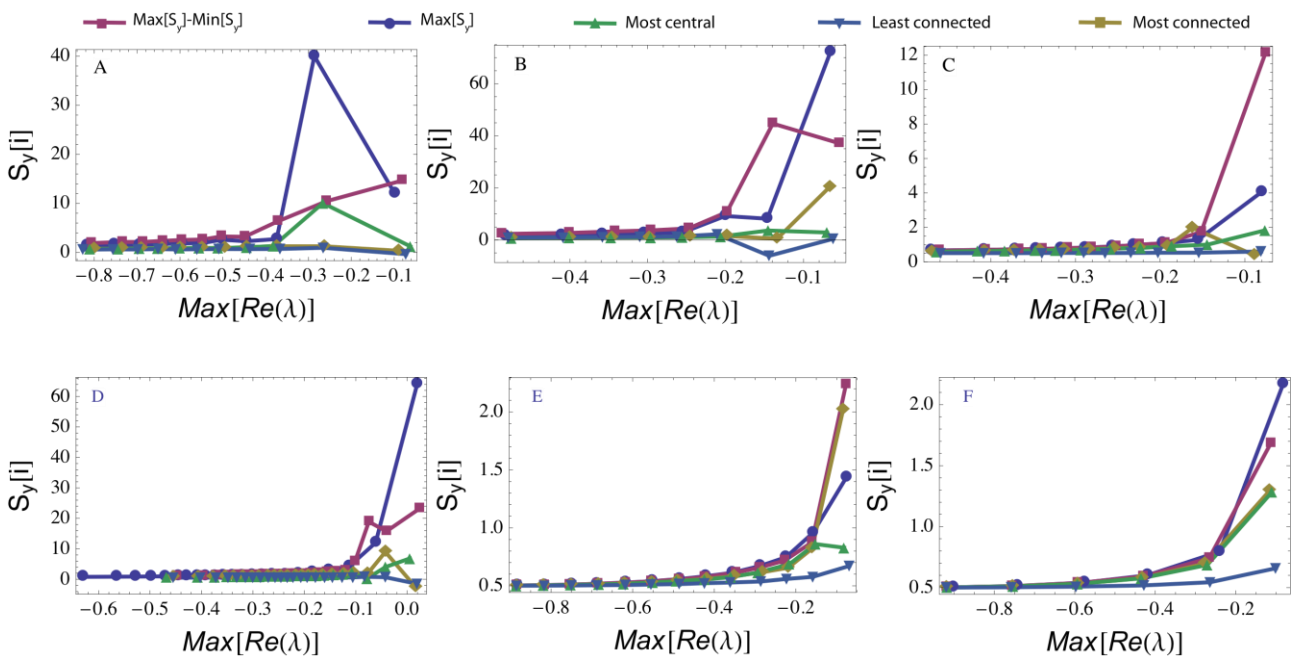

132

133

134 **Figure S8.** Elements of the covariance matrix  $S_y$  corresponding to nodes with the highest  
 135 number of connections (green), lowest number of connections (light blue), highest  
 136 eigenvector centrality (gold),  $\max[S_y]$  (violet) and  $\max[S_y]-\min[S_y]$  (purple) in the case of (A)  
 137 random, (B) predator-prey, (C) mutualistic, (D) mutualistic nested with competition, (E) Small  
 138 world, (F) Barabasi-Albert, networks with strong disorder (of size  $N=20$  and connectivity  
 139  $C=0.3$ ). The plotted values are the ensemble averages of 1000 realizations.

140

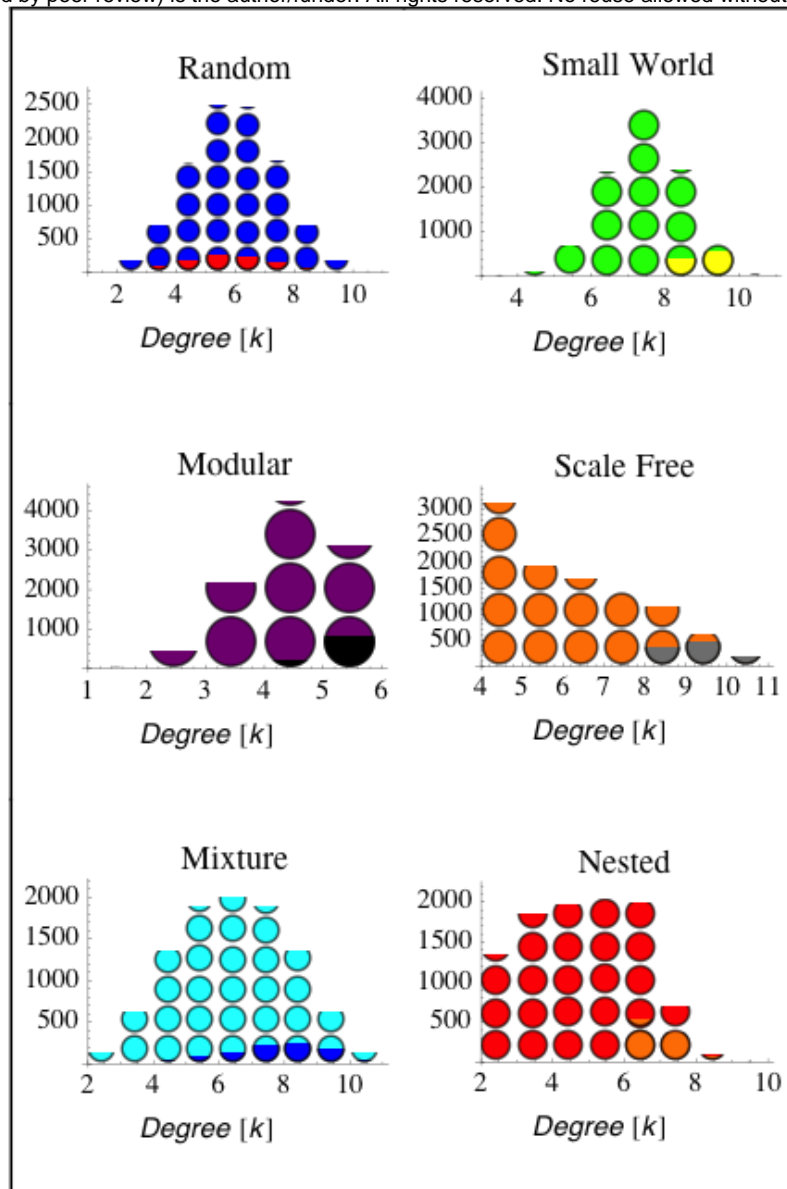

141

142

143 **Figure S9.** Frequency distribution of the degrees (i.e., number of connections) of the  
144 networks' nodes and (with partially filled circles) of the nodes associated with the maximum  
145 value of the covariance matrix  $S_y$  in mean field networks with a variety of interactions. Based  
146 on a set of 100 realizations. Notice how, in mutualistic networks the node corresponding to  
147  $\max[S_y]$  is associated with the nodes with the highest degrees (i.e. the generalist species).

148

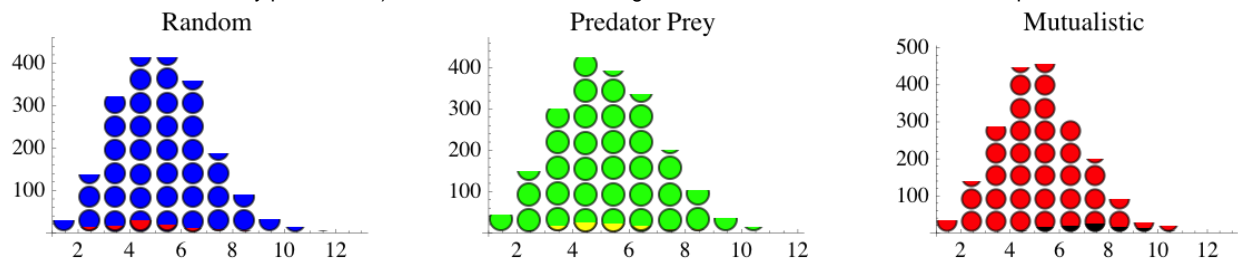

149

150 **Figure S10.** Frequency distribution of the degrees (i.e., number of connections) of the  
151 networks' nodes, and (with partially filled circles) frequency distribution of the nodes  
152 associated with the maximum value of the covariance matrix  $S_y$  in "strongly" disorganized  
153 networks with a variety of interactions. Based on a set of 100 realizations. Notice how, in  
154 mutualistic networks the node corresponding to  $\max[S_y]$  is associated with the nodes with the  
155 highest degrees (i.e. the generalist species).

156

157

158

159

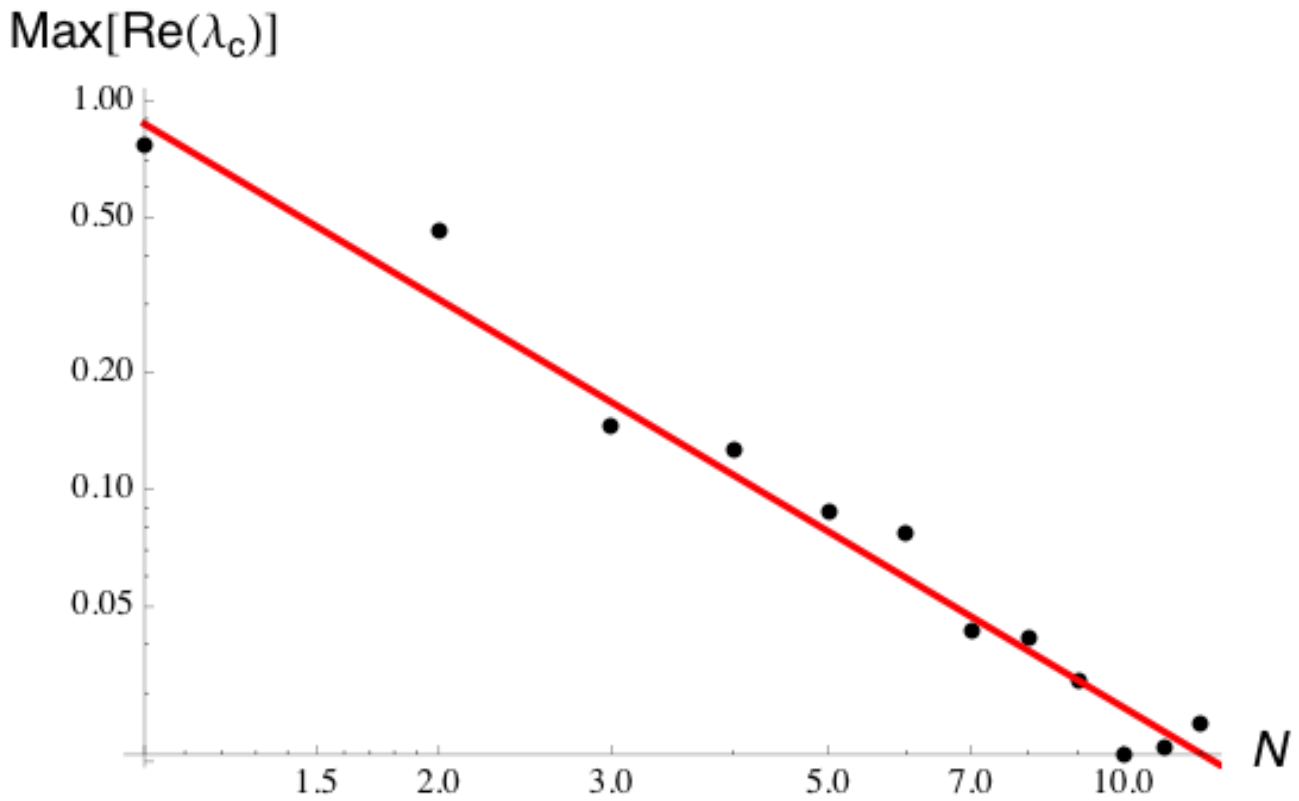

160

161

162 **Figure S11.** Effect of the network size on the magnitude of the early warning sign. Maximum  
163 real part (in absolute value) of the network's eigenvalues as a function of the network size,  $N$   
164 for a random network with  $C=0.25$  and  $p=p_c=1/\sqrt{NC}$ . As  $N$  increases the max of  $\text{Re}(\lambda)$  tends to  
165 zero as  $\text{Max}[\text{Re}(\lambda)] \sim N^{-1.5}$  and the resilience of the system decreases, while the "height" of the  
166 early warning increases. Therefore, as  $N$  increases, the early warning sign becomes sharper  
167 (see also Figure 1 in the main text).

168

169

170

171 **S4. Early Warning for Time Correlation Matrix and Power Spectrum**

172

173 We calculate the time lag correlation matrix,  $\rho_y(\Delta)$  (where  $\Delta$  is the time lag), and the power  
 174 spectrum,  $\mathbf{P}_y(\omega)$  (where  $\omega$  is the frequency) for the steady state dynamics:

175 
$$\rho_y(\Delta) = \langle \mathbf{y}_s(t), \mathbf{y}_s^T(t + \Delta) \rangle = \sigma_y(p) \text{Exp}(\mathbf{A}(p)\Delta) \quad (3)$$

176 
$$\mathbf{P}_y(\omega) = \left| \frac{1}{2\pi} \int_{-\infty}^{+\infty} e^{-i\omega\tau} \rho_y(\tau) d\tau \right|^2 = \left| -\frac{1}{2\pi} (i\omega - \mathbf{A}(p))^{-1} \mathbf{v} \mathbf{I} (i\omega + \mathbf{A}^T(p))^{-1} \right|^2 \quad (4)$$

177 The following figures show the behavior of the autocorrelation and power spectrum as the  
 178 system approaches instability.

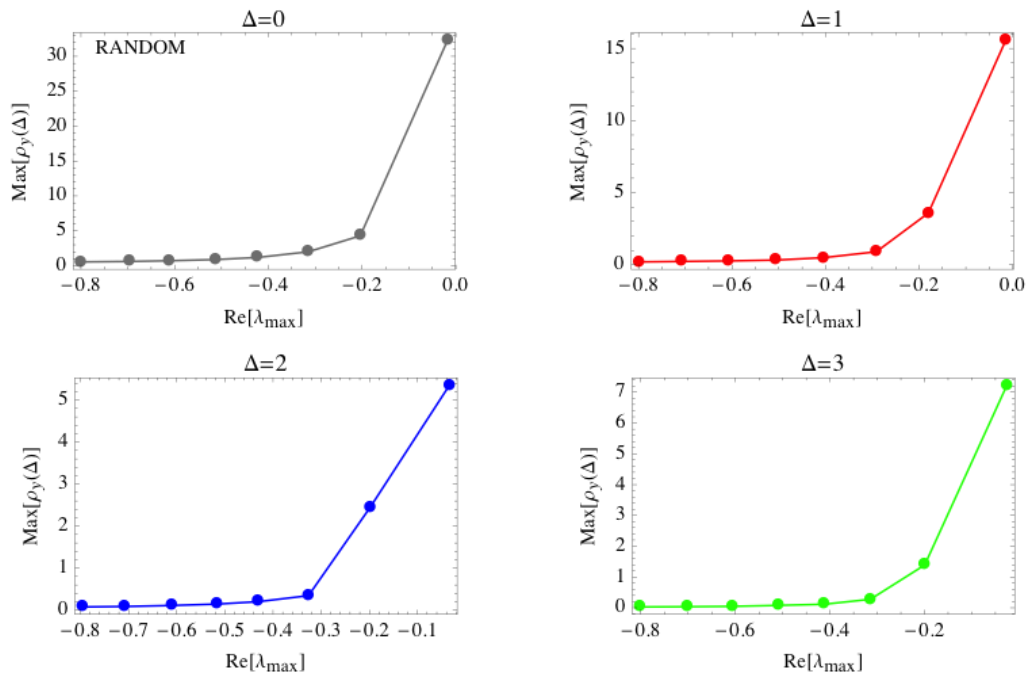

179

180

181 **Figure S12.** Increase in  $\text{Max}[\rho_y]$  as  $\text{Max}[\text{Re}(\lambda)]$  tends to zero for “strongly” disordered  
 182 networks with a random architecture with  $N=20$  and  $C=0.3$ . Increasing values of  $\text{Max}[\text{Re}(\lambda)]$   
 183 are obtained by increasing the interaction strength,  $p$ . The plotted values are ensemble  
 184 averages of 100 realizations.



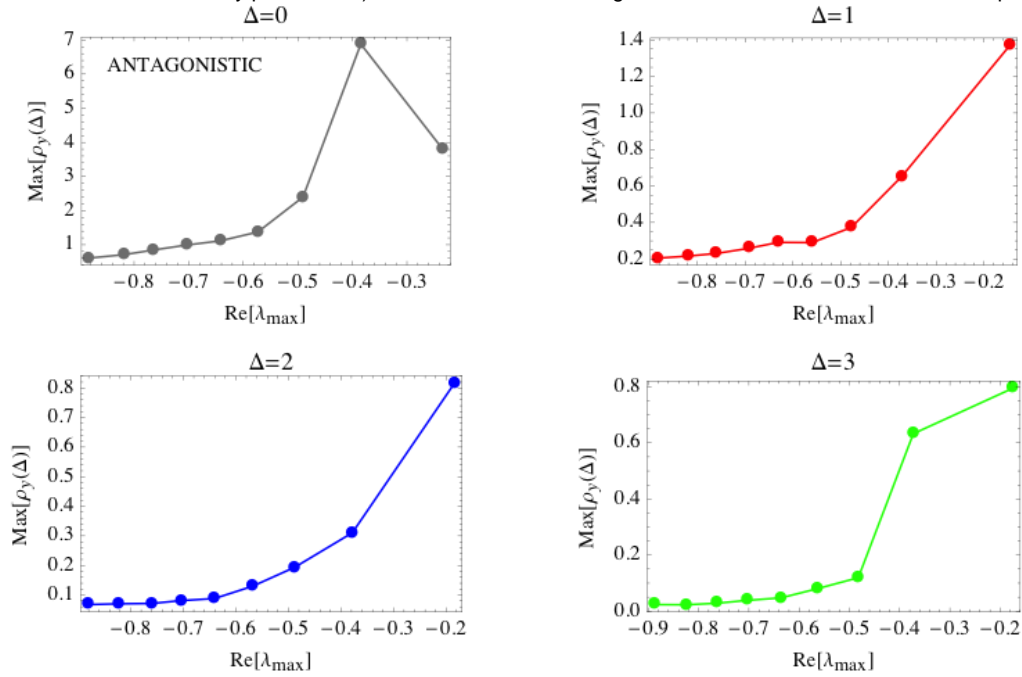

185

186 **Figure S13.** Increase in  $\text{Max}[\rho_y]$  as  $\text{Max}[\text{Re}(\lambda)]$  tends to zero for “strongly” disordered  
187 networks with a predator-prey architecture and  $N=20$ ,  $C=0.3$ . Increasing values of  $\text{Max}[\text{Re}(\lambda)]$   
188 are obtained by increasing the interaction strength,  $p$ . The plotted values are ensemble  
189 averages of 100 realizations.

190

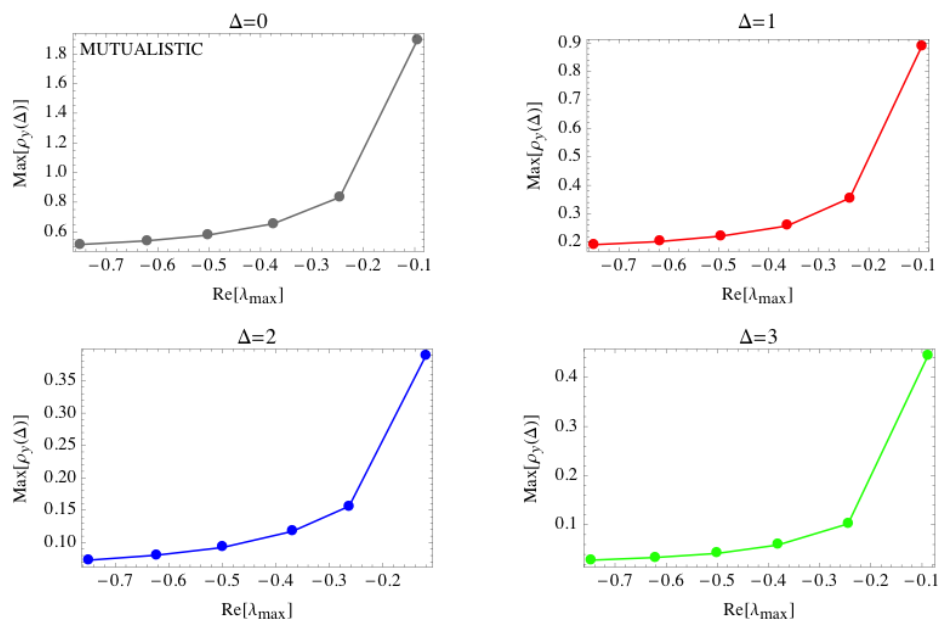

191

192 **Figure S14.** Increase in  $\text{Max}[\rho_y]$  as  $\text{Max}[\text{Re}(\lambda)]$  tends to zero for “strongly” disordered  
193 networks with a mutualistic architecture and  $N=20$ ,  $C=0.3$ . Increasing values of  $\text{Max}[\text{Re}(\lambda)]$   
194 are obtained by increasing the interaction strength,  $p$ . The plotted values are ensemble  
195 averages of 100 realizations.

196

197

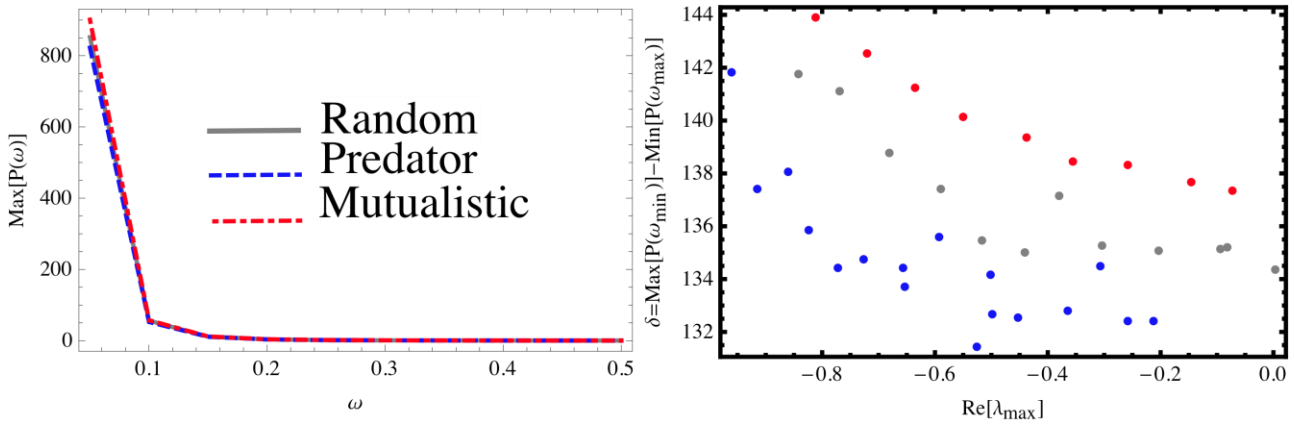

198

199

200 **Figure S15.** Left panel: max element of the power spectrum matrix as a function of frequency  
201 for three different architectures. The impact of the structure on the spectrum is negligible.  
202 Right panel: Power spectrum evaluated in the minimum and maximum frequency as  $p$  tends  
203 to  $p_c$  (and thus  $\text{Max}[\text{Re}(\lambda)]$  tends to zero) for strongly disordered systems ( $N=20$  and  $C=0.2$ )  
204 with random, predator-prey, and mutualistic interactions. Increasing values of  $\text{Max}[\text{Re}(\lambda)]$   
205 lead to a decrease in  $\delta = \text{Max}[P(\omega_{\min})] - \text{Max}[P(\omega_{\max})]$ , that therefore might be considered a  
206 precursor for a critical transition. However, the intensity of this early warning sign is quite  
207 weak and thus difficult to detect. The plotted values are ensemble averages of 100  
208 realizations.

209

210

211

212

213

214

215

216

217 **S5. Early Warning Detection**

218 To evaluate whether the onset to instability can be anticipated in time by an increase in  
219  $Max[\mathbf{S}_y]$  (or in other suitably chosen elements of  $\mathbf{S}_y$ ), we test the correlation (11) between  
220  $Max[\mathbf{S}_y]$  and the control parameter ( $p$  or  $C$ ) that is gradually varied to increase  $Max[Re(\lambda)]$  up  
221 to a given threshold (here chosen equal to  $-0.2$ ). If the correlation,  $\rho_k$ , (evaluated with the  
222 Kendall- $\tau$  test) is significant and greater than 0.5, the increase in  $Max[\mathbf{S}_y]$  is interpreted as an  
223 early warning sign. We repeat this analysis for 1000 realizations of the random interaction  
224 strength network and determine the distribution of correlations along with the number of  
225 realizations with positive warning sign.

226

227

228

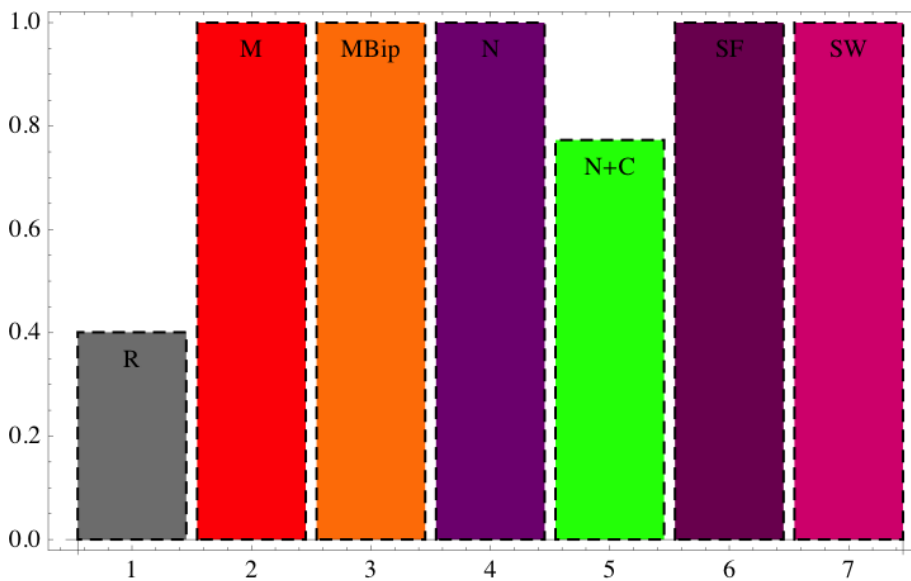

229

230 **Figure S16.** Probability of detecting true positives (i.e. of not missing a warning sign) in the  
231 case of mean field networks, using the same detection criteria as in Figure 4.

232

233

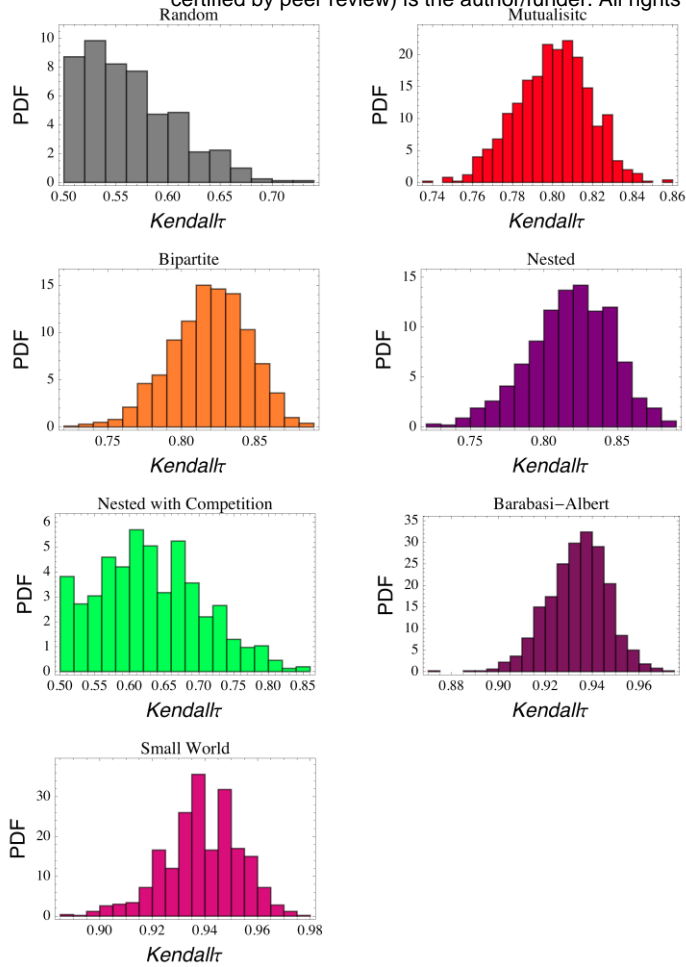

234

235

236 **Figure S17.** Frequency distribution of the  $\rho_K$  statistics used to detect early warning signs of  
237 instability in the case of mean field networks.

238

239

240

241

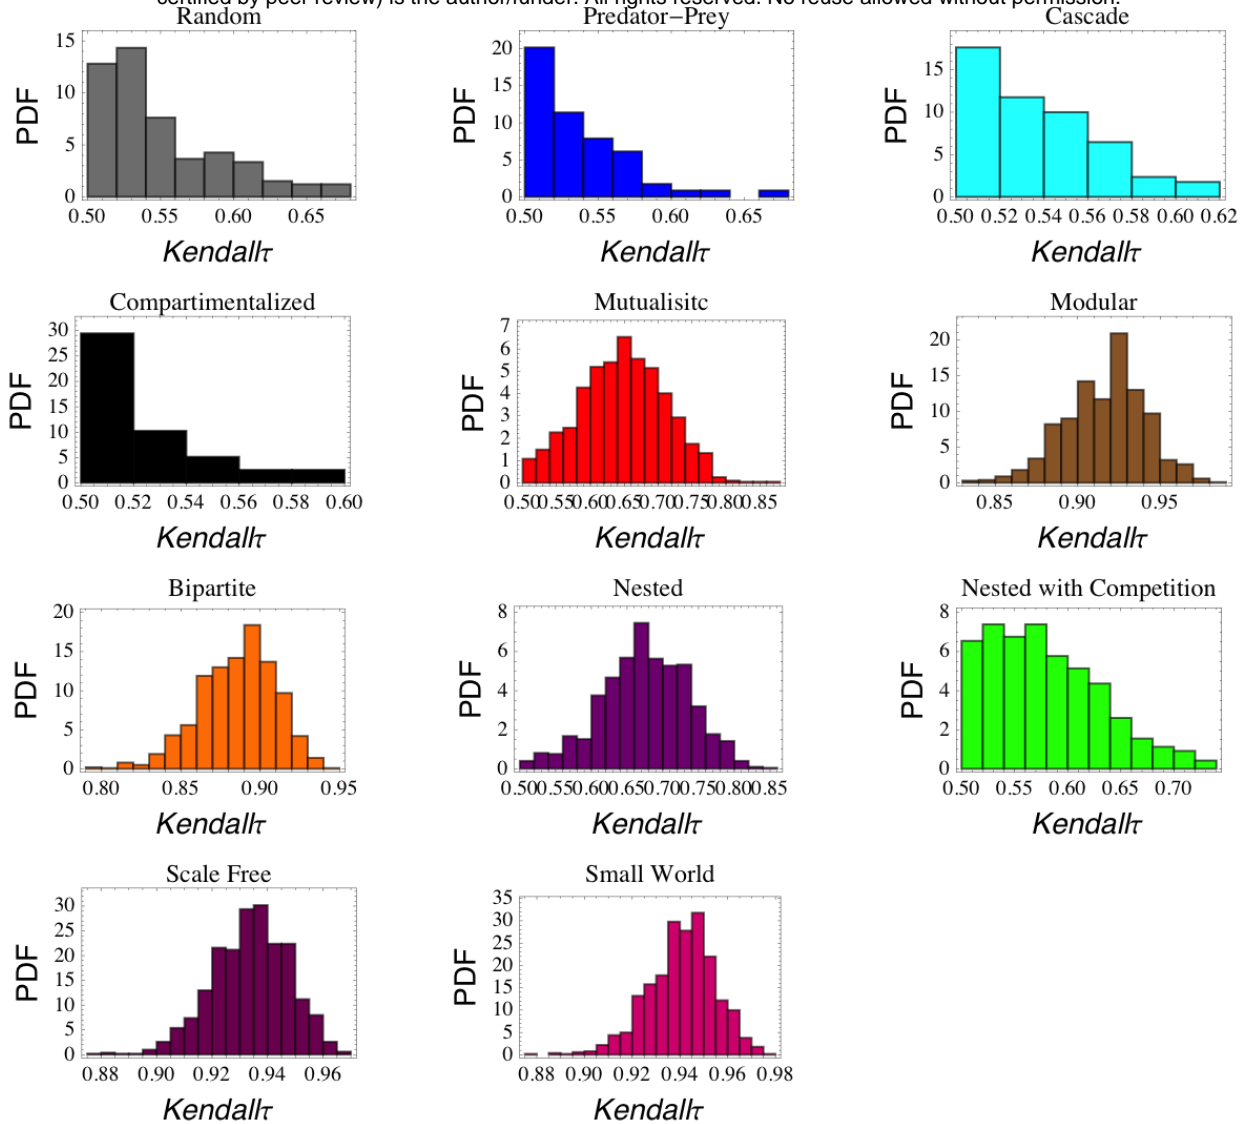

242

243 **Figure S18.** Frequency distribution of the  $\rho_K$  statistics used to detect early warning signs of  
 244 instability in the case of full disordered networks.

245

246

## 247 S6. References

- 248 1. May, R. M. Will a large complex system be stable? *Nature*, **238**:413-414 (1972).
- 249 2. Pimm, S. L.; Lawton, J. H.; Cohen, J. E. Food web patterns and their consequences.  
 250 *Nature* **350**(6320): 669-672 (1991).
- 251 3. Williams, Richard J., and Neo D. Martinez. "Simple rules yield complex food webs."  
 252 *Nature* 404.6774 (2000): 180-183.

- 253 4. Stouffer, Daniel B., and Jordi Bascompte. "Compartmentalization increases food-web  
254 persistence." *Proceedings of the National Academy of Sciences* 108.9 (2011): 3648-  
255 3652.
- 256 5. Newman M.E.J. *Networks: An Introduction* (Oxford University Press, 2010).
- 257 6. Allesina S. & Tang S., Stability criteria for complex ecosystems *Nature* **483**: 205–208  
258 (2012).
- 259 7. Bascompte, J., Jordano, P., Melián, C. J. & Olesen, J. M. The nested assembly of plant-  
260 animal mutualistic networks. *Proc. Natl Acad. Sci. USA* 100, 9383–9387, (2003)
- 261 8. Suweis, S., Simini, F., Banavar, J. & Maritan, A. Emergent structural and dynamical  
262 properties of ecological mutualistic networks. *Nature*. **500**:449 (2013).
- 263 9. Albert R. & Barabasi A-L. Statistical mechanics of complex network. *Rev. Mod. Phys.*  
264 **74**(1):47 (2002).
- 265 10. Watts, Duncan J., and Steven H. Strogatz. "Collective dynamics of 'small-world'  
266 networks." *Nature* 393(6684): 440-442 (1998).
- 267 11. Dakos V., et al. Methods for detecting early warnings of critical transitions in time  
268 series illustrated using simulated ecological data. *PLoS ONE* 7(7):e41010 (2012).

269

270

271
